# Supplementary material
Source: Springer Nature journal article supplement (https://www.springermedizin.de/resource/supplementary/12882_2011_218_MOESM1_ESM.pdf/9453290)

eGFR (mL/min/1.73 m<sup>2</sup>)

200.0  
150.0  
100.0  
50.0  
0.0

0.20

0.40

0.60

0.80

1.00

1.20

Total bilirubin (mg/dL)

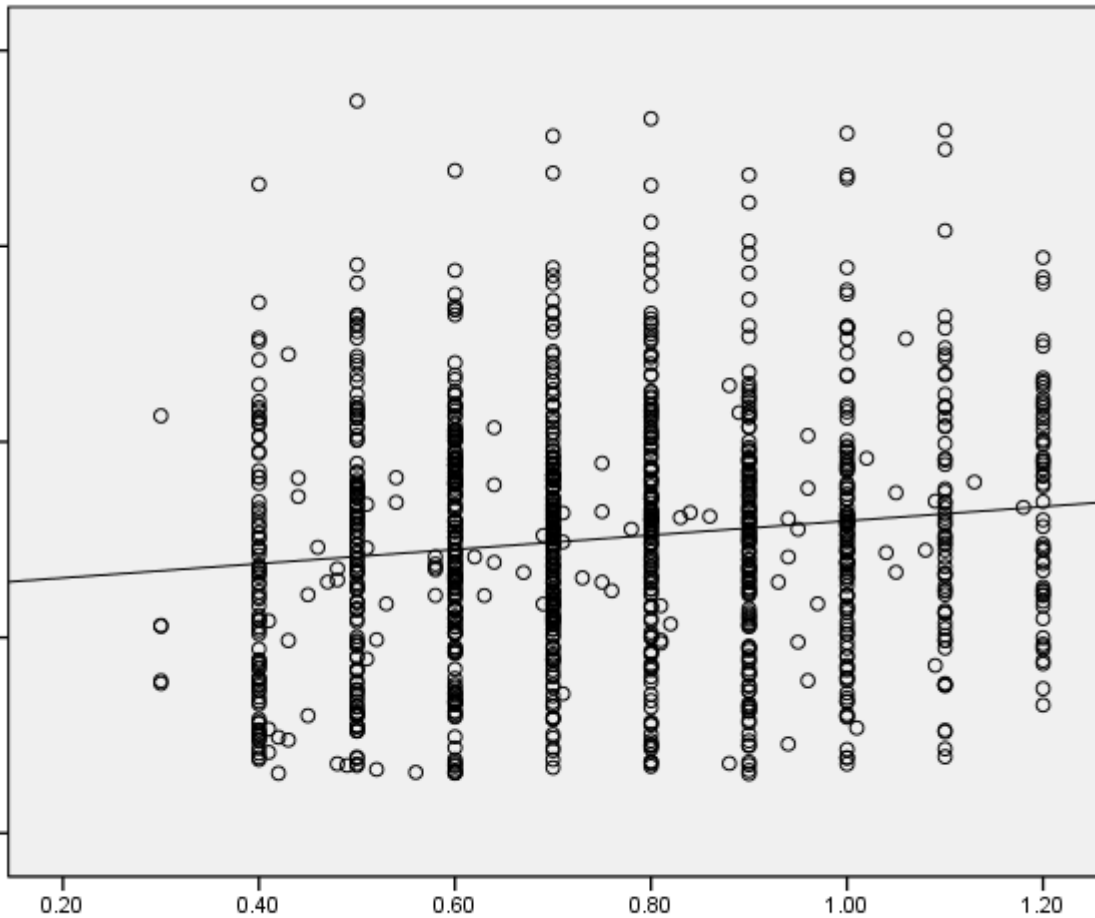

Supplement: MOESM1 [file 9453290]
